# Supplementary material for: Chemical properties of superatomic Li3O clusters from a density functional theory perspective: formation of chloride and adsorption behavior on graphynes
Source: Royal Society of Chemistry journal article supplement (doi:10.1039/d3cp05478k), 2024-01-01
Supplement: d3cp05478k2.pdf [file d3cp05478k2.pdf]

Supplementary Information for  
Chemical properties of superatomic  $\text{Li}_3\text{O}$  clusters from density functional  
theory perspective: formation of chloride and adsorption behavior on  
graphynes

Xiao Wang<sup>1</sup>, Meng Zhang<sup>1</sup>, Wei Cao<sup>2</sup>

<sup>1</sup> School of Physics, East China University of Science and Technology, Shanghai  
200237, China.

<sup>2</sup> Nano and Molecular Systems Research Unit, University of Oulu, FIN-90014, Finland.

Correspondence:

Meng Zhang, Email: [mzhang@ecust.edu.cn](mailto:mzhang@ecust.edu.cn)

Wei Cao, Email: [wei.cao@oulu.fi](mailto:wei.cao@oulu.fi)

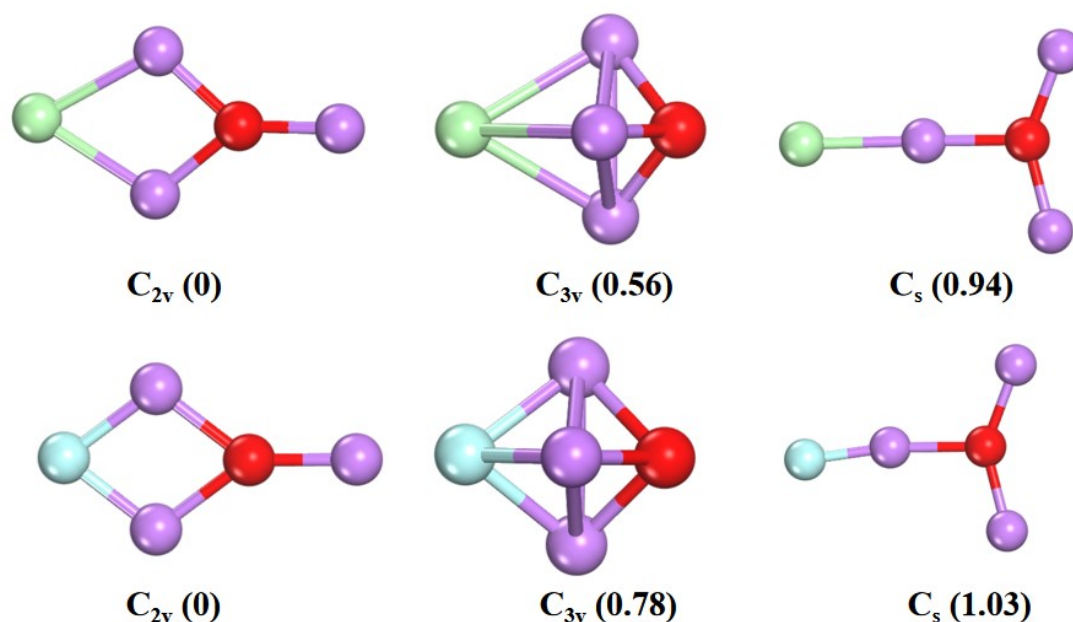

Figure S1. The lowest energy structures and the metastable isomers of the  $\text{Li}_3\text{O}(\text{Cl})$  and  $\text{Li}_3\text{O}(\text{F})$  halides. Numbers in the brackets are the energies (in eV) of the clusters relative to the lowest energy energies. Green, blue and red spheres represent chlorine, fluorine and oxygen atoms, respectively. Space groups were determined with a tolerance of 0.1 Å.
